# Supplementary material for: Multi-Population Selective Genotyping to Identify Soybean [Glycine max (L.) Merr.] Seed Protein and Oil QTLs
Source: PubMed Central journal article supplement (PMC4889660; doi:10.1534/g3.116.027656), 2016-04-01
Supplement: supp_g3.116.027656_FigureS1.pdf [file supp_g3.116.027656_FigureS1.pdf]

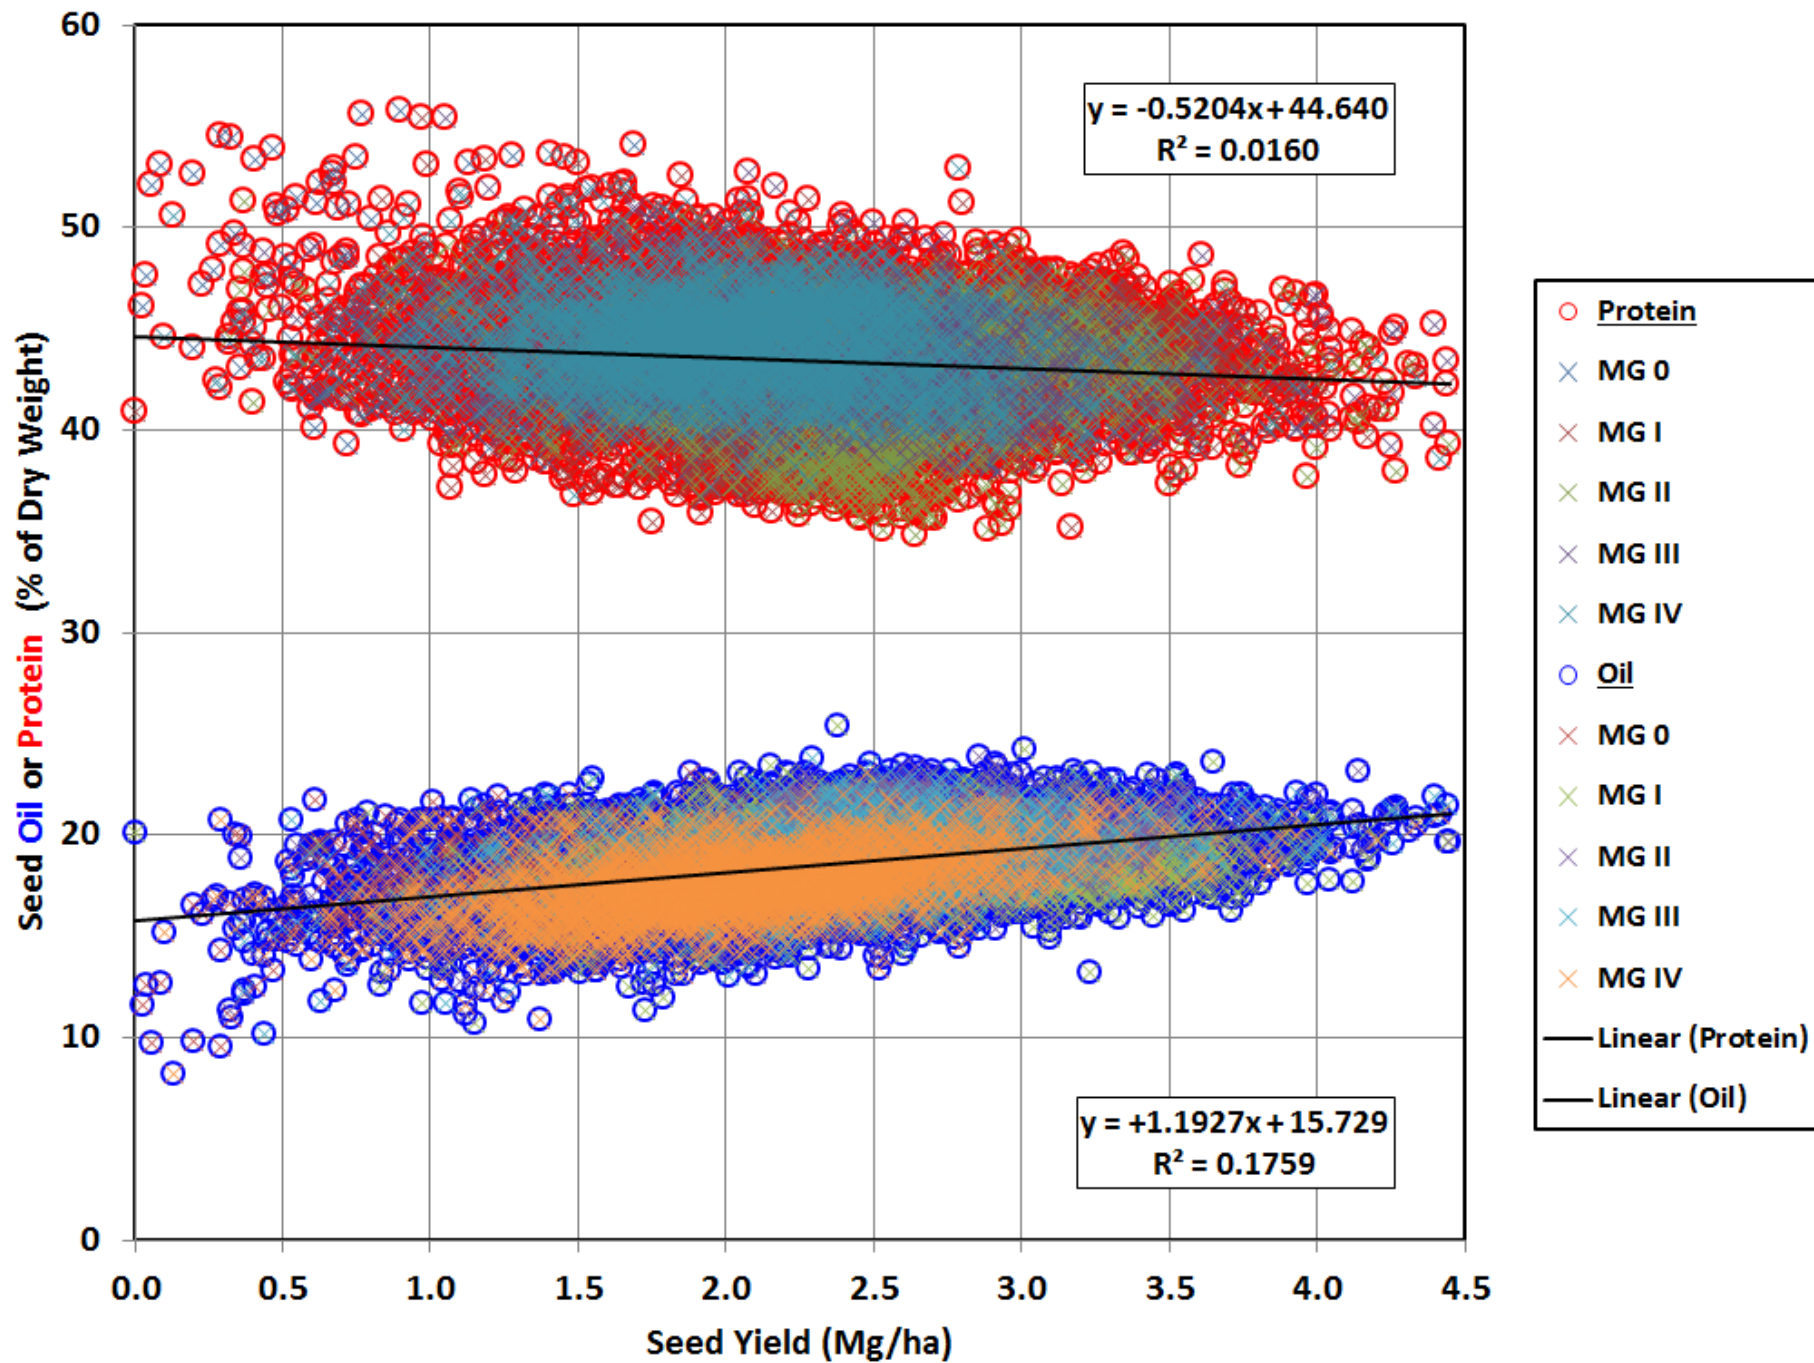

**FIGURE S1.** Soybean seed protein and oil values plotted against the corresponding seed yield values for maturity group (MG) 0 to IV accessions in the [*Glycine. max* (L.) Merr.] germplasm collection. Only 11,473 of the 12,141 accessions in these MGs have in-common values for all three traits. These data were provided courtesy of the soybean germplasm curator (R.L. Nelson, USDA-ARS, Urbana, IL).
