# Supplementary material for: Multi-Population Selective Genotyping to Identify Soybean [Glycine max (L.) Merr.] Seed Protein and Oil QTLs
Source: PubMed Central journal article supplement (PMC4889660; doi:10.1534/g3.116.027656), 2016-04-01
Supplement: supp_g3.116.027656_FigureS2.pdf [file supp_g3.116.027656_FigureS2.pdf]

**A**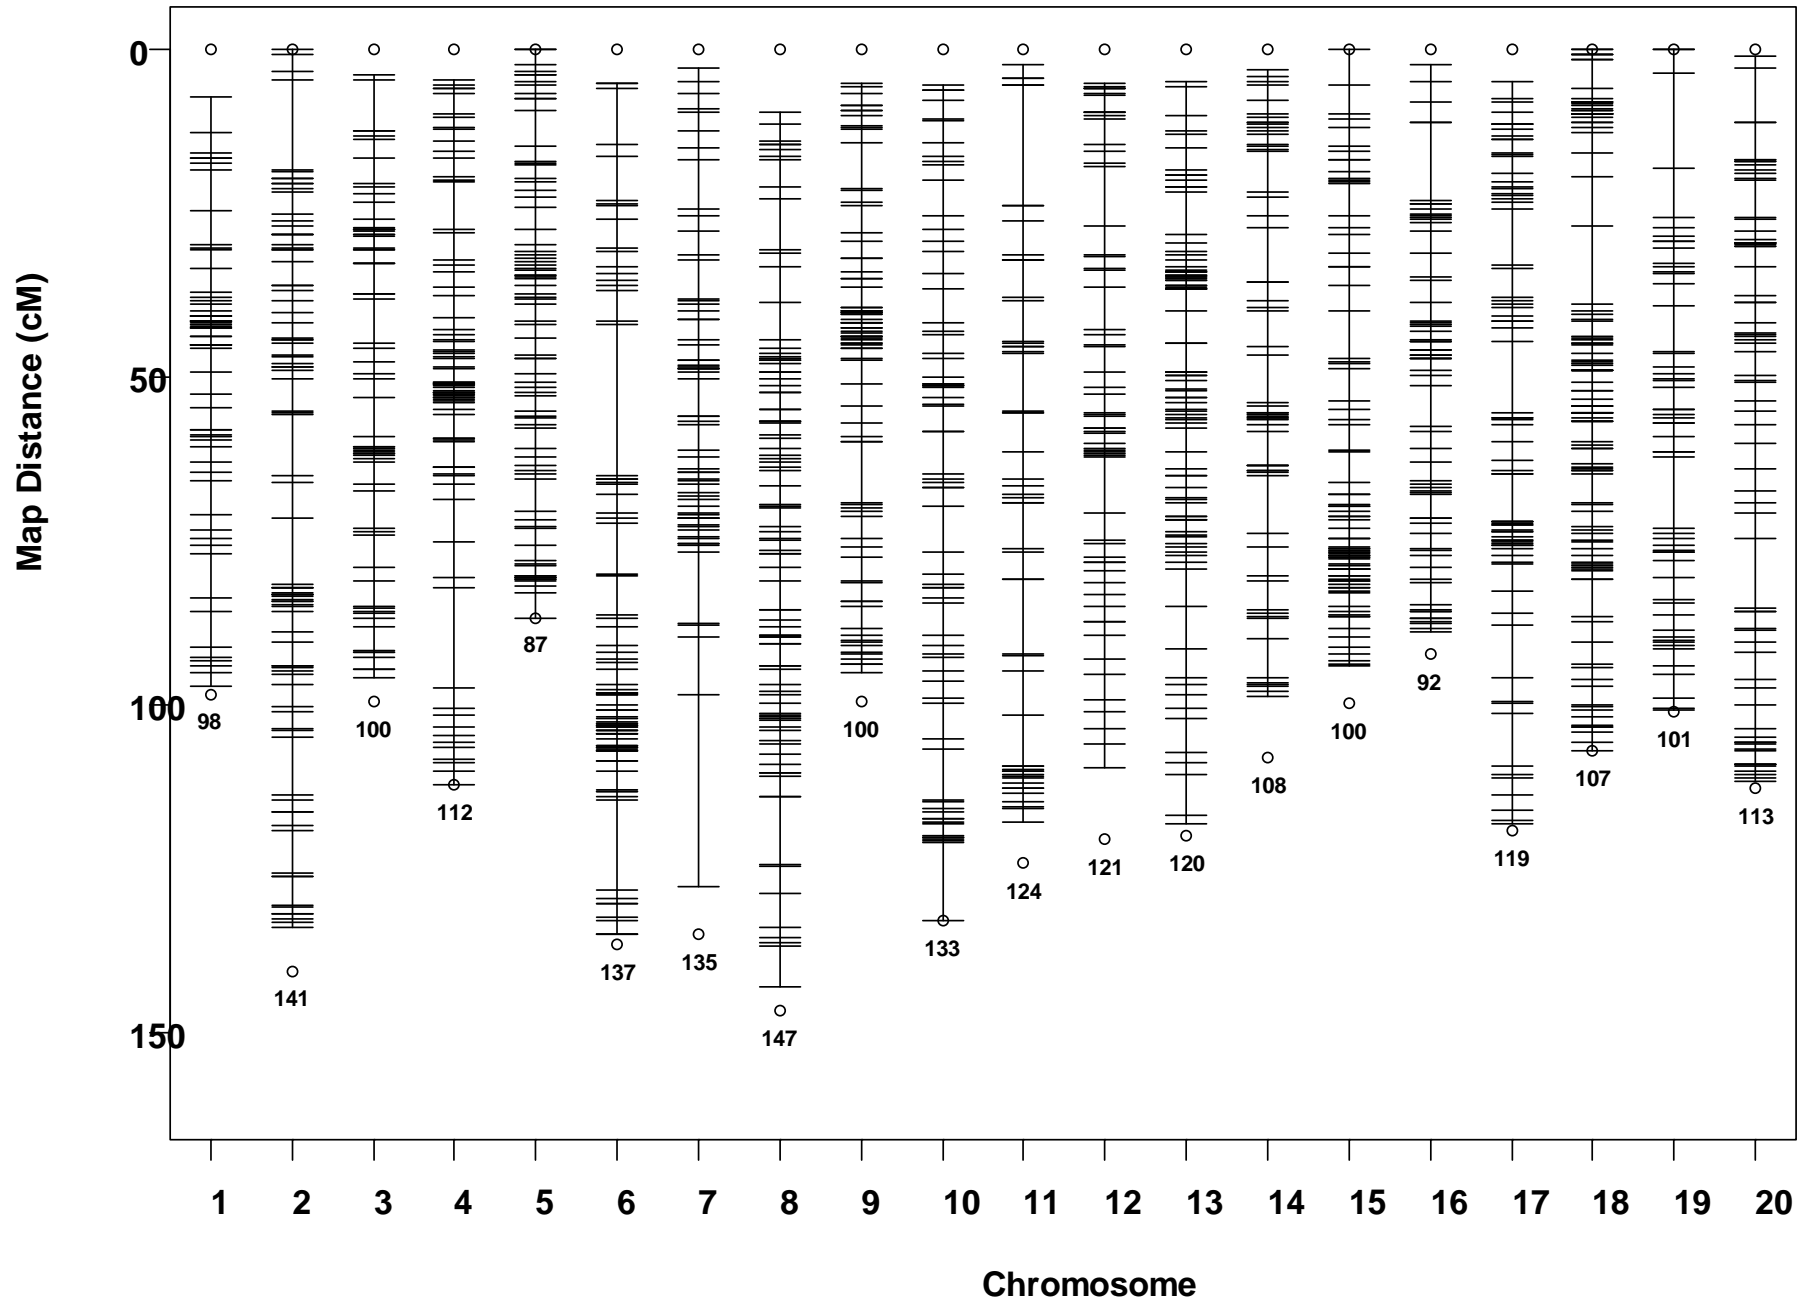

**B**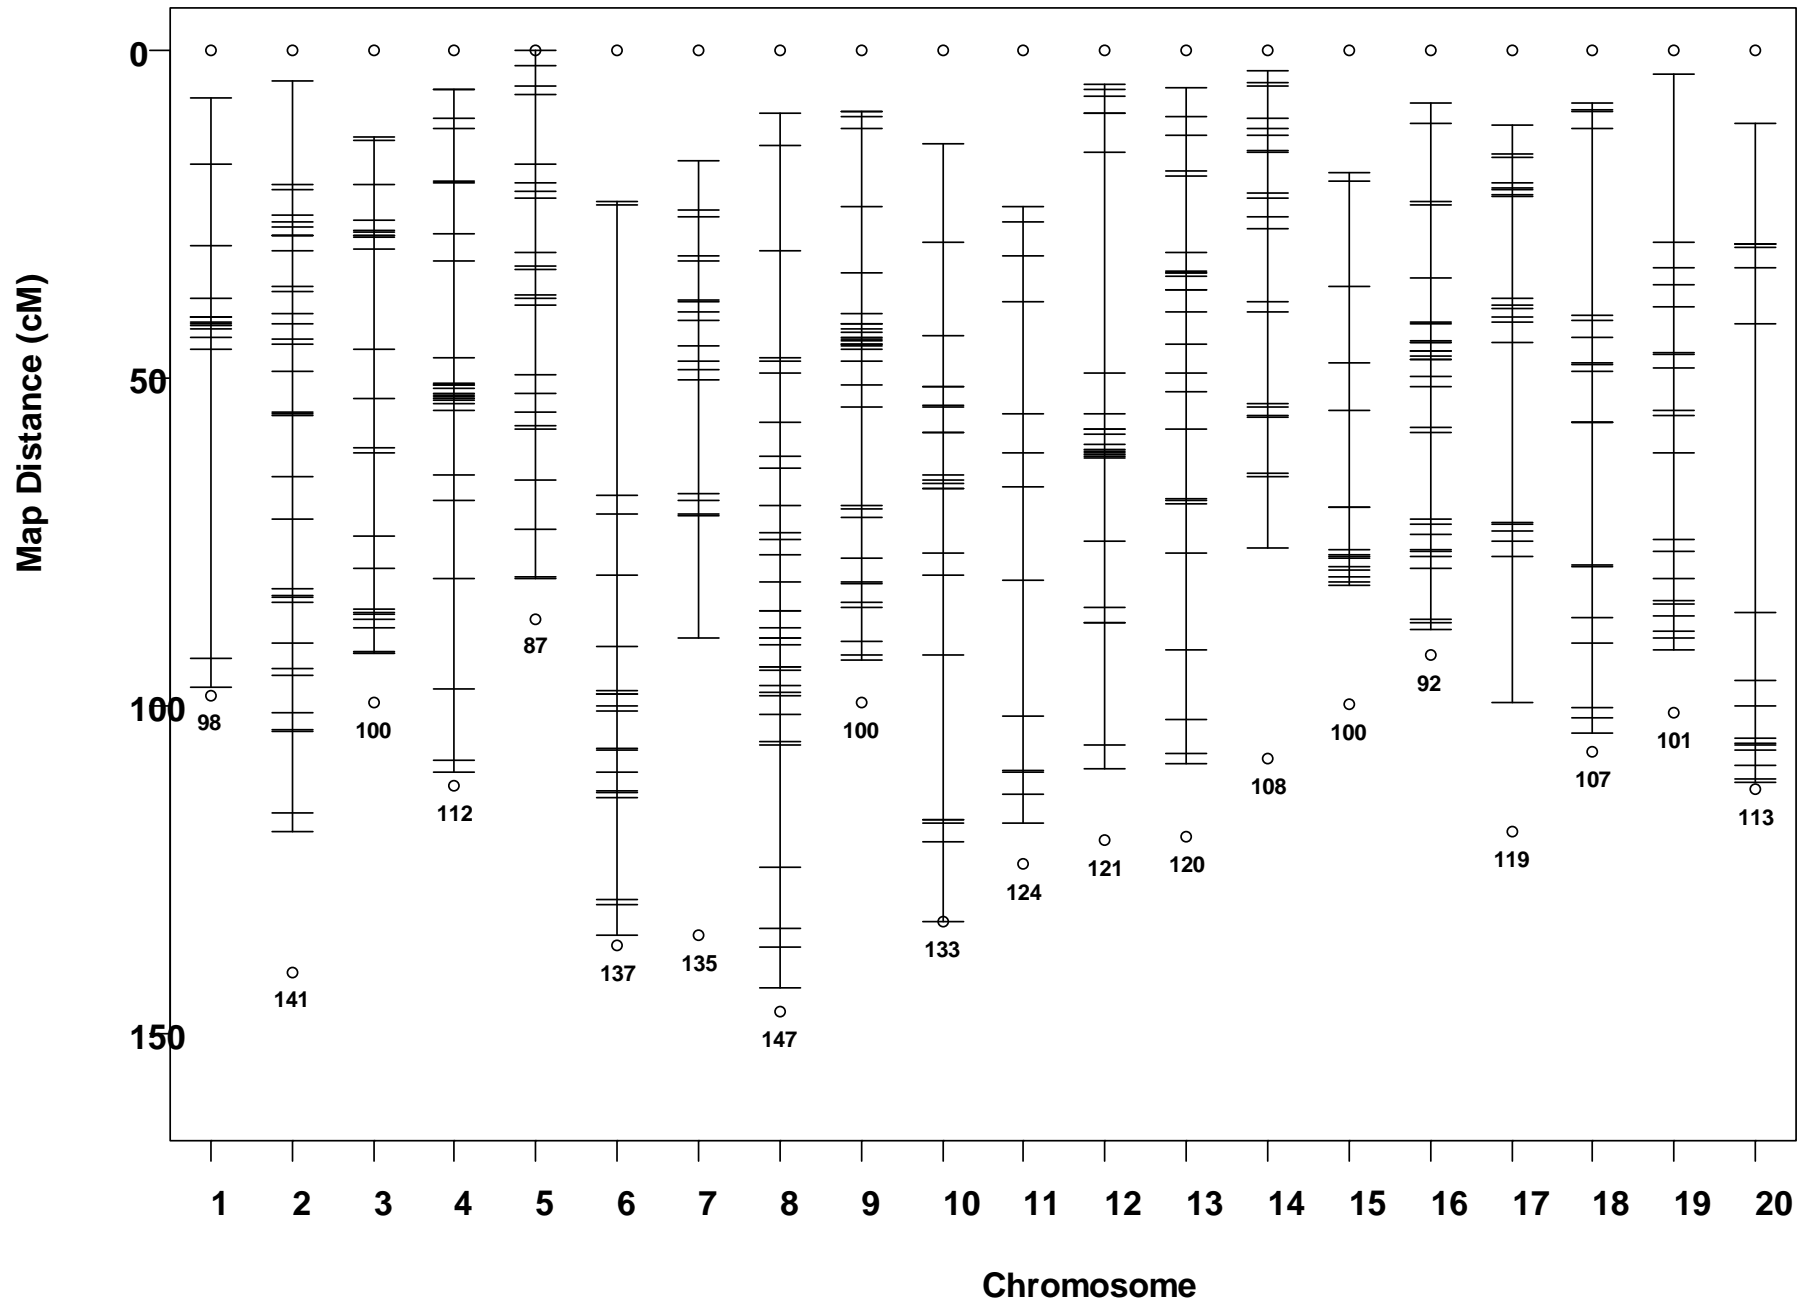

**FIGURE S2.** SNP marker map position (cross-hairs) in the 20 soybean chromosomes for (A) all of the 1536 SNPs in the chip developed by Hyten *et al.* (2010) and (B) just the 452 SNPs segregating in (the example) mating 1 of the 48 F<sub>2</sub> populations examined in this study. Open circles denote proximal and distal ends of each chromosome in the Version 4.0 genetic map (5500 markers of all types) that has a total genomic (Kosambi) distance of 2296.4 cM, but totals to only 2156.2 cM for a map that includes only the 1536 SNP markers.
