# Supplementary material for: Multi-Population Selective Genotyping to Identify Soybean [Glycine max (L.) Merr.] Seed Protein and Oil QTLs
Source: PubMed Central journal article supplement (PMC4889660; doi:10.1534/g3.116.027656), 2016-04-01
Supplement: supp_g3.116.027656_FigureS3.pdf [file supp_g3.116.027656_FigureS3.pdf]

**A**

Soybean Chromosome

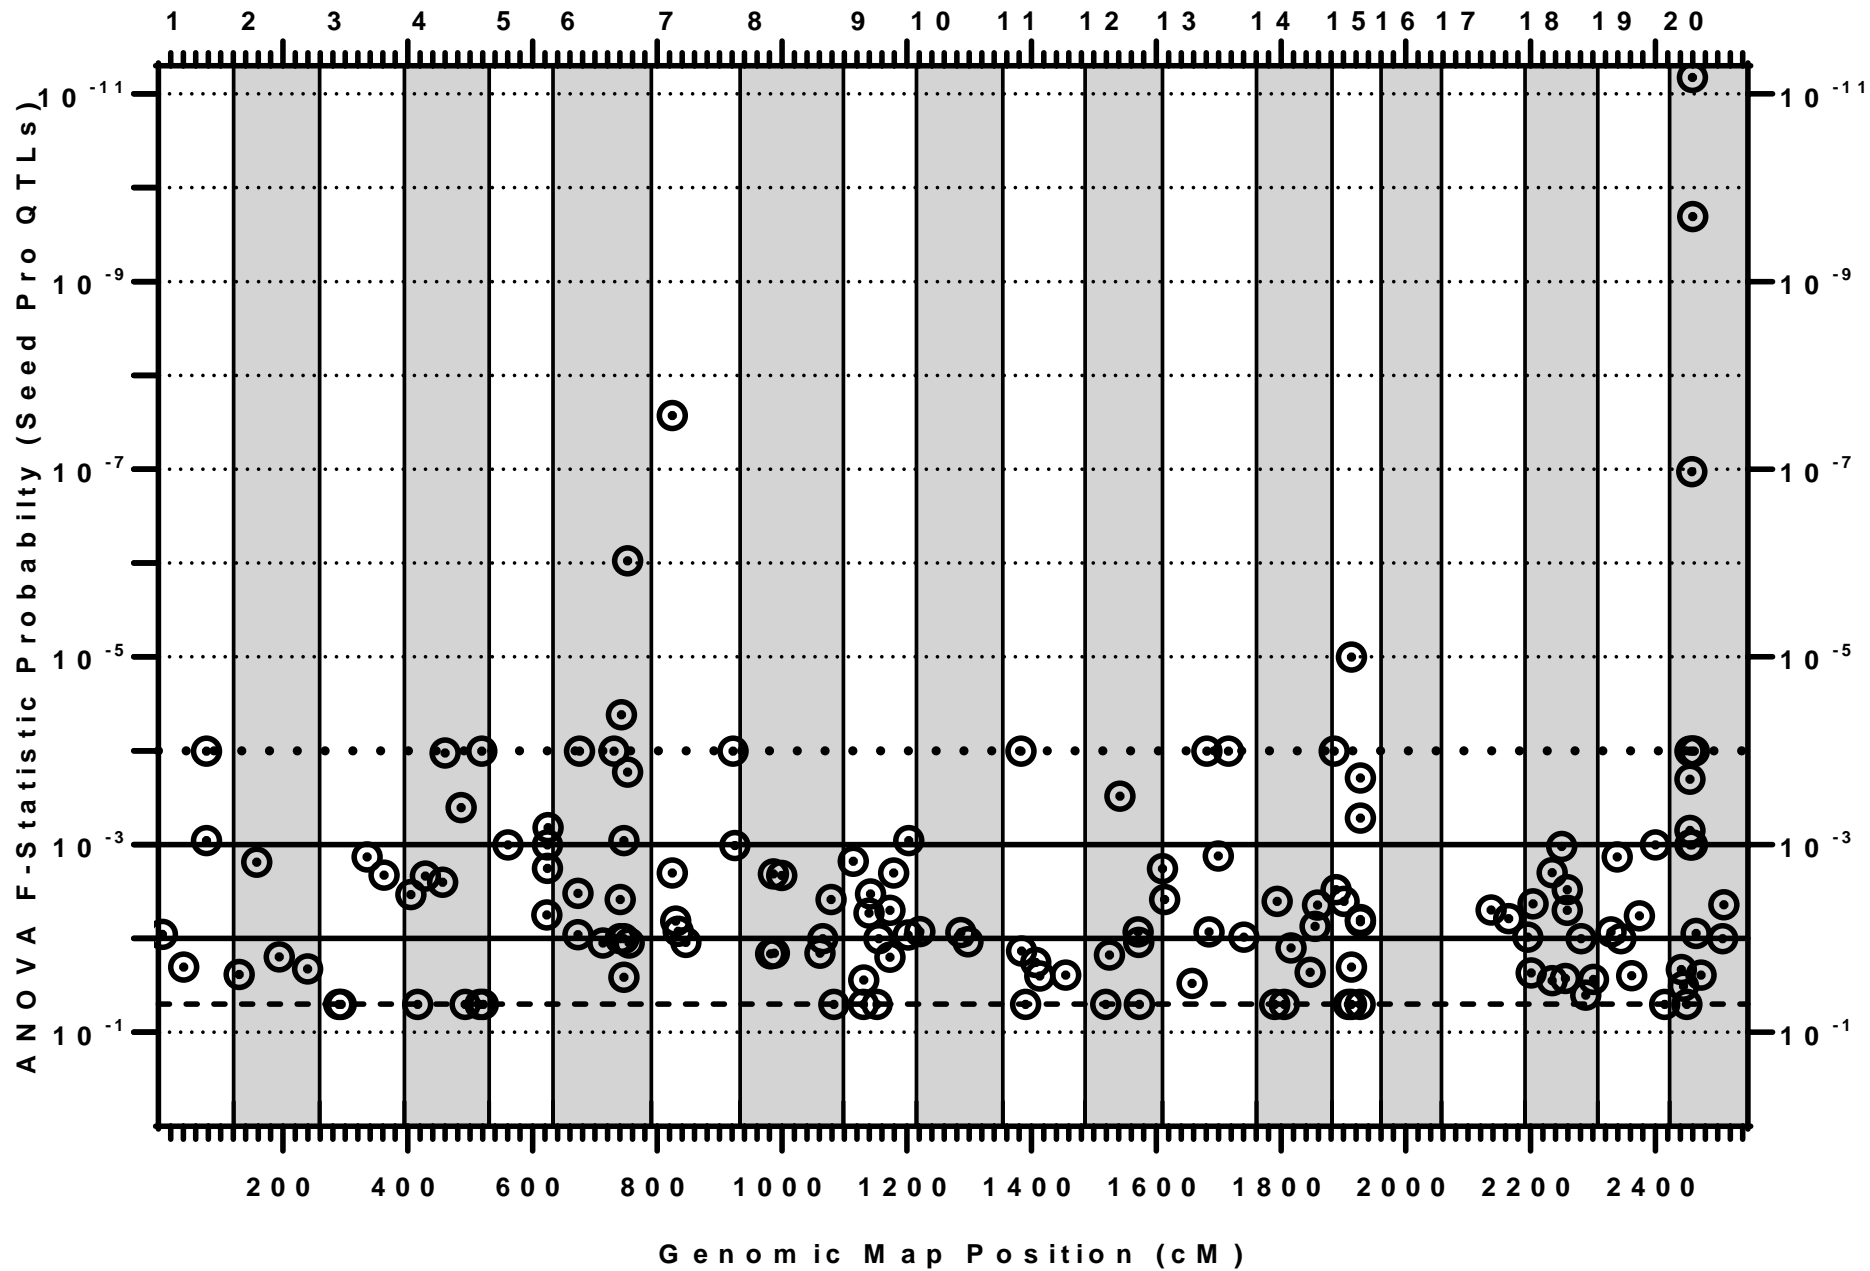

**B**

Soybean Chromosome

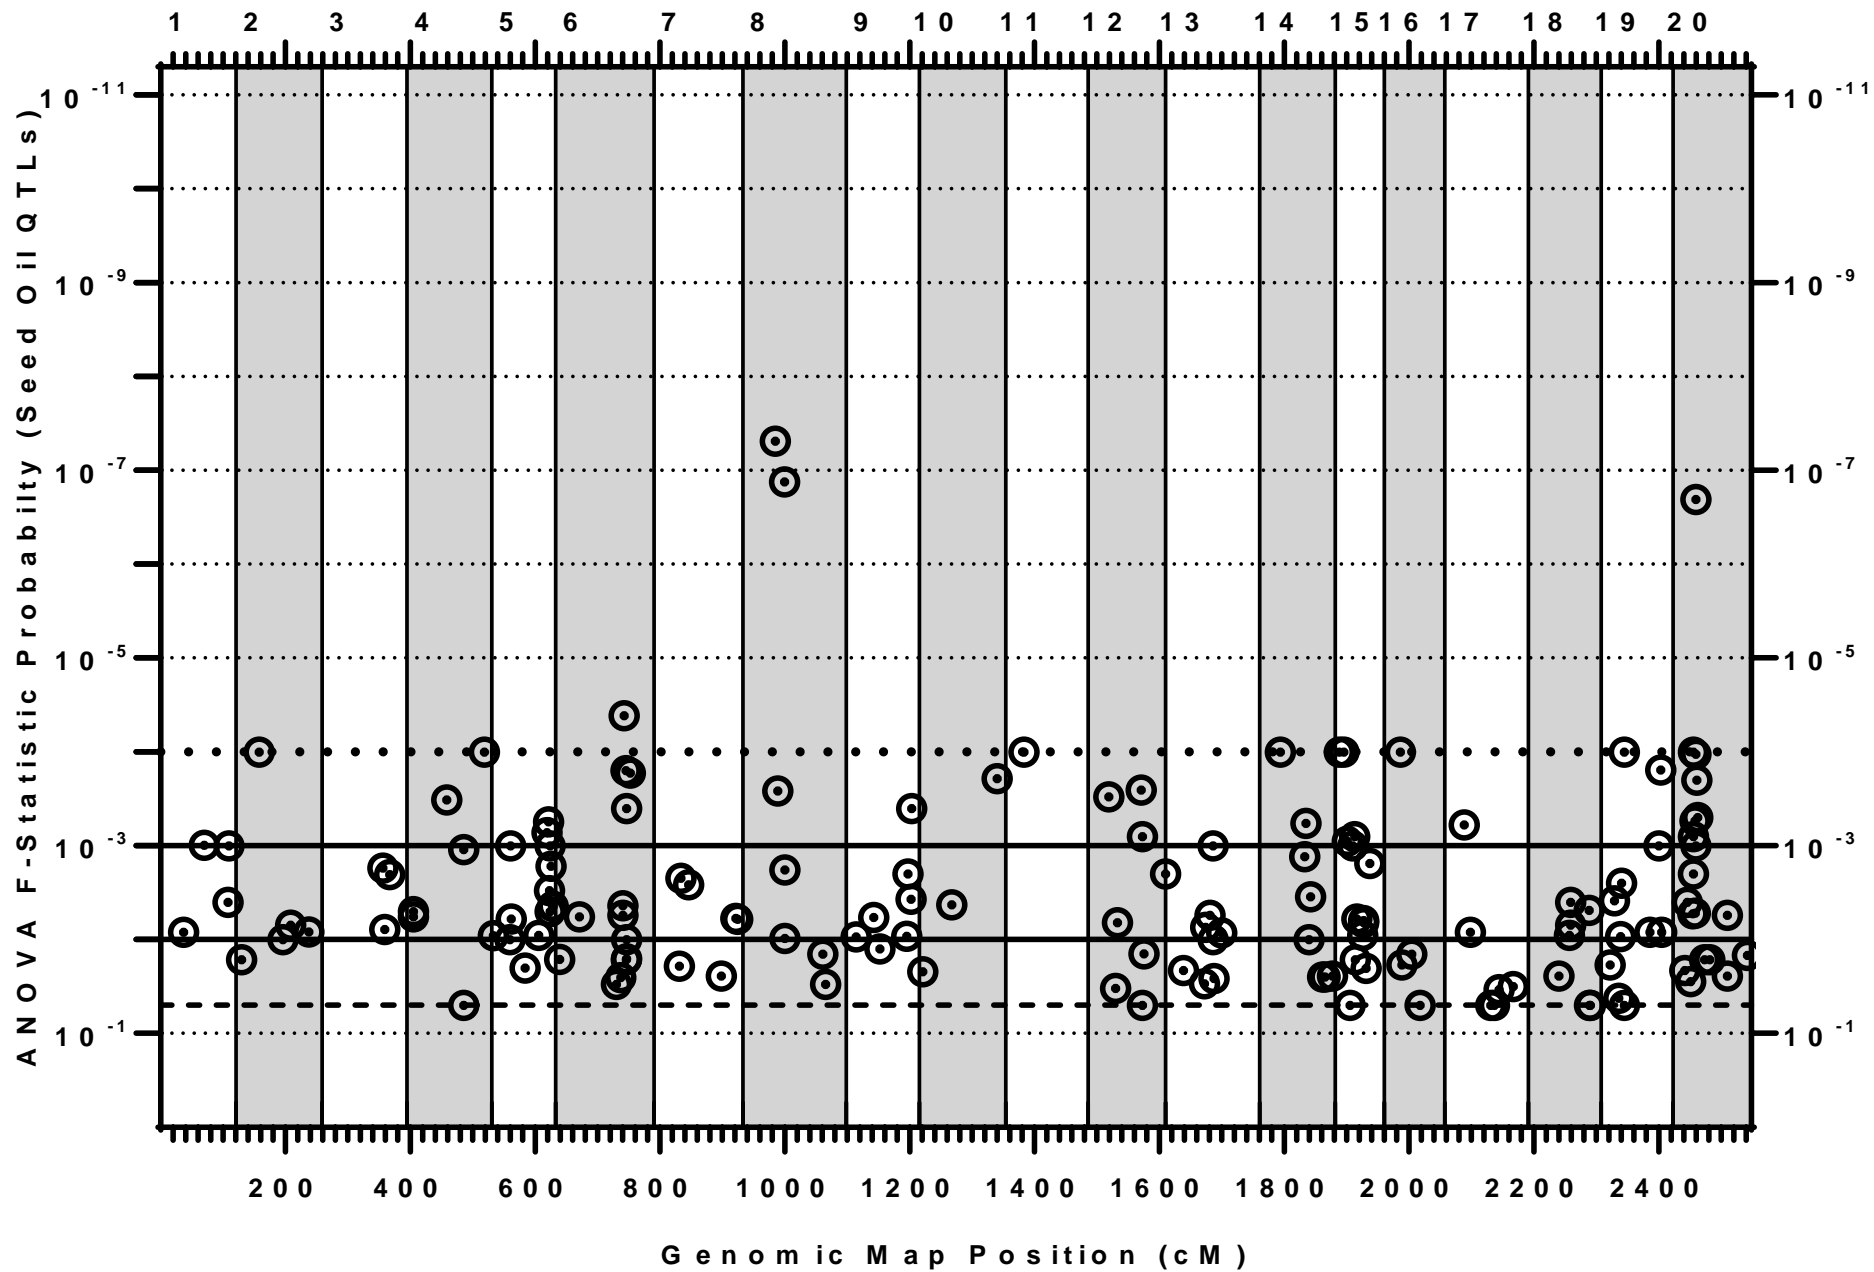

**FIGURE S3.** A graph of ANOVA F-statistic probabilities for (A) seed protein QTLs and (B) seed oil QTLs listed in SoyBase (Grant *et al.* 2010). SoyBase provides only Version 3.0 genetic map positions. ANOVA-based QTL detection was used in older reports, so for a common-unit comparative purpose, the LOD scores values provided in more recent reports were converted to F-statistic p-values. Because of the comparison-wise nature of F-statistic p-values, horizontal lines were placed at x-axis  $10^{-x}$  values equivalent to p-values of 0.05 (dashed), 0.01 and 0.001 (solid), and 0.0001 (dotted) for reader convenience when comparing this graph with Figure 3 graph.
