# Supplementary material for: Multi-Population Selective Genotyping to Identify Soybean [Glycine max (L.) Merr.] Seed Protein and Oil QTLs
Source: PubMed Central journal article supplement (PMC4889660; doi:10.1534/g3.116.027656), 2016-04-01
Supplement: supp_g3.116.027656_TableS2.pdf [file supp_g3.116.027656_TableS2.pdf]

**TABLE S2.** F<sub>1</sub>, F<sub>2</sub>, F<sub>1:2</sub> and F<sub>2:3</sub> plants, seeds, and progeny numbers in each of the 48 matings, ordered by MG then by mating code and ID number. Population distributional statistics are shown for the one replicate seed protein (and oil) assay (all progeny) in each mating. Only those progeny in the lowest and highest quintiles of the protein distribution, based on quintile cut-off values, were selected for a two replicate seed protein assay. Using the 2-replicate means, progenies with the 22 lowest and 22 highest seed protein were identified, and their respective 44 F<sub>2</sub> progenitors were selectively genotyped (SG). The final percentage of F<sub>2</sub> plants chosen for selective genotyping is shown in the last column.

| Mating |      |     | Female              | One-Replicate Seed Protein |                         |                        |                          | Seed Oil                                   | Protein-Oil | Two-Replicate Mean Seed Protein Value |    |    |                                | F <sub>2</sub> plants |            |              |             |     |     |     |     |                          |
|--------|------|-----|---------------------|----------------------------|-------------------------|------------------------|--------------------------|--------------------------------------------|-------------|---------------------------------------|----|----|--------------------------------|-----------------------|------------|--------------|-------------|-----|-----|-----|-----|--------------------------|
| No.    | ID   | MG  | Parent<br>Accession | F <sub>1</sub><br>Plts     | F <sub>1:2</sub><br>Sds | F <sub>2</sub><br>Plts | F <sub>2:3</sub><br>Prog | F <sub>2:3</sub> Distributional Statistics |             |                                       |    |    | Statistics                     | Phenotype             | Low Pro 22 | Quintile Cut | High Pro 22 | Min | Max | Min | Max | Selectively<br>Genotyped |
|        |      |     |                     | ----- number -----         |                         |                        |                          | ----- g kg <sup>-1</sup> -----             |             |                                       |    |    | ----- g kg <sup>-1</sup> ----- |                       |            |              | - % -       |     |     |     |     |                          |
| 1      | 1001 | 000 | PI 153296           | 17                         | 397                     | 265                    | 253                      | 388                                        | 432         | 483                                   | 32 | 72 | 36                             | 70                    | -0.85      | 399          | 414         | 437 | 448 | 465 | 488 | 17.4                     |
| 2      | 1002 | 000 | PI 189963           | 19                         | 666                     | 277                    | 269                      | 396                                        | 435         | 487                                   | 29 | 74 | 34                             | 80                    | -0.86      | 398          | 418         | 437 | 442 | 467 | 491 | 16.4                     |
| 3      | 1003 | 000 | PI 548399           | 9                          | 394                     | 260                    | 251                      | 398                                        | 437         | 484                                   | 29 | 74 | 37                             | 82                    | -0.85      | 400          | 423         | 440 | 441 | 466 | 489 | 17.5                     |
| 4      | 1004 | 000 | PI 372423           | 19                         | 659                     | 254                    | 251                      | 400                                        | 439         | 494                                   | 30 | 75 | 33                             | 80                    | -0.85      | 401          | 422         | 438 | 446 | 468 | 506 | 17.5                     |
| 5      | 1005 | 000 | FC 30687            | 19                         | 649                     | 261                    | 255                      | 389                                        | 433         | 483                                   | 36 | 79 | 38                             | 82                    | -0.88      | 392          | 411         | 432 | 440 | 466 | 483 | 17.3                     |
| 6      | 1006 | 000 | PI 153293           | 8                          | 311                     | 267                    | 260                      | 385                                        | 438         | 497                                   | 36 | 79 | 39                             | 83                    | -0.88      | 395          | 416         | 443 | 437 | 469 | 505 | 16.9                     |
| 7      | 1007 | 000 | PI 372412           | 13                         | 389                     | 269                    | 261                      | 401                                        | 437         | 479                                   | 28 | 73 | 35                             | 81                    | -0.87      | 403          | 419         | 434 | 441 | 465 | 483 | 16.9                     |
| 8      | 1009 | 000 | PI 548414           | 17                         | 537                     | 270                    | 268                      | 393                                        | 437         | 489                                   | 28 | 73 | 36                             | 81                    | -0.88      | 402          | 418         | 436 | 444 | 466 | 486 | 16.4                     |
| 9      | 1022 | 00  | PI 153302           | 10                         | 332                     | 265                    | 254                      | 391                                        | 422         | 462                                   | 20 | 82 | 24                             | 85                    | -0.76      | 395          | 405         | 419 | 419 | 446 | 462 | 17.3                     |
| 10     | 1023 | 00  | PI 159764           | 17                         | 358                     | 252                    | 242                      | 397                                        | 430         | 483                                   | 31 | 86 | 29                             | 88                    | -0.82      | 399          | 415         | 436 | 432 | 456 | 481 | 18.2                     |
| 11     | 1024 | 00  | PI 438415           | 16                         | 345                     | 264                    | 259                      | 388                                        | 425         | 457                                   | 19 | 81 | 22                             | 84                    | -0.79      | 399          | 408         | 430 | 419 | 445 | 458 | 17.0                     |
| 12     | 1025 | 00  | PI 153301           | 18                         | 287                     | 265                    | 258                      | 395                                        | 423         | 463                                   | 19 | 80 | 26                             | 86                    | -0.79      | 395          | 408         | 428 | 433 | 448 | 467 | 17.1                     |
| 13     | 1026 | 00  | PI 189880           | 18                         | 184                     | 178                    | 173                      | 395                                        | 419         | 450                                   | 14 | 74 | 12                             | 72                    | -0.78      | 398          | 408         | 418 | 427 | 435 | 451 | 25.4                     |
| 14     | 1027 | 00  | PI 153297           | 16                         | 431                     | 257                    | 250                      | 395                                        | 428         | 481                                   | 21 | 82 | 31                             | 89                    | -0.78      | 400          | 411         | 422 | 423 | 448 | 480 | 17.6                     |
| 15     | 2211 | 00  | HHP                 | 8                          | 524                     | 219                    | 147                      | 383                                        | 434         | 482                                   | 53 | 87 | 57                             | 93                    | -0.81      | 387          | 417         | 430 | 450 | 456 | 480 | 29.9                     |
| 16     | 2212 | 00  | AC Proteus          | 9                          | 405                     | 286                    | 278                      | 392                                        | 418         | 450                                   | 13 | 45 | 15                             | 60                    | -0.73      | 393          | 407         | 424 | 414 | 432 | 451 | 15.8                     |
| 17     | 2213 | 00  | AC Proteina         | 16                         | 466                     | 288                    | 275                      | 387                                        | 416         | 446                                   | 17 | 59 | 20                             | 70                    | -0.80      | 390          | 403         | 434 | 414 | 441 | 458 | 16.0                     |
| 18     | 1039 | 0   | PI 427138           | 20                         | 761                     | 266                    | 257                      | 385                                        | 419         | 464                                   | 17 | 61 | 28                             | 83                    | -0.75      | 390          | 405         | 424 | 429 | 441 | 462 | 17.1                     |
| 19     | 1040 | 0   | PI 261469           | 15                         | 691                     | 260                    | 238                      | 375                                        | 422         | 463                                   | 23 | 71 | 32                             | 85                    | -0.80      | 380          | 407         | 422 | 426 | 448 | 463 | 18.5                     |
| 20     | 1041 | 0   | PI 181571           | 24                         | 710                     | 268                    | 248                      | 388                                        | 419         | 454                                   | 18 | 62 | 30                             | 84                    | -0.71      | 394          | 407         | 422 | 424 | 443 | 460 | 17.7                     |
| 21     | 1042 | 0   | PI 424148           | 8                          | 297                     | 219                    | 210                      | 392                                        | 424         | 465                                   | 21 | 68 | 30                             | 84                    | -0.76      | 396          | 412         | 427 | 419 | 447 | 462 | 21.0                     |
| 22     | 1043 | 0   | PI 423954           | 13                         | 379                     | 267                    | 248                      | 383                                        | 429         | 464                                   | 26 | 73 | 27                             | 82                    | -0.73      | 363          | 408         | 428 | 428 | 445 | 461 | 17.7                     |
| 23     | 1044 | 0   | PI 154196           | 18                         | 1117                    | 271                    | 245                      | 384                                        | 419         | 454                                   | 21 | 67 | 28                             | 83                    | -0.78      | 385          | 405         | 428 | 424 | 443 | 461 | 18.0                     |

|    |      |     |            |    |      |     |     |     |     |     |    |    |    |    |       |     |     |     |     |     |     |      |
|----|------|-----|------------|----|------|-----|-----|-----|-----|-----|----|----|----|----|-------|-----|-----|-----|-----|-----|-----|------|
| 24 | 1054 | I   | PI 437088A | 7  | 789  | 225 | 184 | 402 | 435 | 481 | 24 | 70 | 26 | 20 | -0.80 | 406 | 423 | 432 | 429 | 454 | 487 | 23.9 |
| 25 | 1055 | I   | PI 423949  | 12 | 1014 | 286 | 265 | 386 | 428 | 476 | 24 | 69 | 42 | 50 | -0.82 | 392 | 410 | 422 | 423 | 448 | 477 | 16.6 |
| 26 | 1056 | I   | PI 427141  | 11 | 906  | 285 | 258 | 392 | 431 | 471 | 27 | 73 | 39 | 46 | -0.77 | 397 | 411 | 427 | 431 | 458 | 477 | 17.1 |
| 27 | 1057 | I   | PI 437716A | 6  | 497  | 272 | 246 | 392 | 425 | 460 | 17 | 58 | 27 | 21 | -0.67 | 396 | 413 | 437 | 433 | 446 | 468 | 17.9 |
| 28 | 1058 | I   | PI 423942  | 6  | 548  | 279 | 246 | 379 | 432 | 480 | 27 | 73 | 42 | 50 | -0.76 | 375 | 411 | 431 | 428 | 455 | 482 | 17.9 |
| 29 | 1075 | II  | PI 423948A | 2  | 238  | 208 | 183 | 372 | 430 | 475 | 38 | 72 | 43 | 66 | -0.75 | 370 | 408 | 423 | 439 | 454 | 474 | 24.0 |
| 30 | 1076 | II  | PI437112A  | 11 | 703  | 217 | 188 | 371 | 431 | 483 | 34 | 69 | 43 | 66 | -0.76 | 375 | 410 | 425 | 439 | 451 | 479 | 23.4 |
| 31 | 1098 | II  | PI 548608  | 14 | 685  | 254 | 230 | 389 | 419 | 457 | 15 | 31 | 21 | 29 | -0.66 | 389 | 405 | 419 | 427 | 435 | 456 | 19.1 |
| 32 | 1107 | III | PI 445845  | 14 | 891  | 278 | 222 | 384 | 426 | 471 | 31 | 57 | 36 | 49 | -0.78 | 385 | 407 | 433 | 421 | 450 | 473 | 19.8 |
| 33 | 1108 | III | PI 398516  | 12 | 966  | 280 | 226 | 376 | 423 | 466 | 27 | 50 | 29 | 37 | -0.74 | 374 | 403 | 419 | 432 | 443 | 464 | 19.5 |
| 34 | 1109 | III | PI 91725-4 | 15 | 838  | 263 | 225 | 383 | 425 | 480 | 30 | 55 | 50 | 64 | -0.76 | 387 | 404 | 426 | 439 | 445 | 486 | 19.6 |
| 35 | 1110 | III | PI 340011  | 13 | 833  | 254 | 208 | 384 | 425 | 476 | 30 | 55 | 36 | 49 | -0.81 | 385 | 405 | 421 | 417 | 444 | 474 | 21.2 |
| 36 | 1111 | III | PI 243532  | 9  | 489  | 273 | 216 | 386 | 425 | 496 | 42 | 68 | 52 | 65 | -0.74 | 386 | 405 | 429 | 440 | 449 | 497 | 20.4 |
| 37 | 1113 | III | PI 408138C | 12 | 1042 | 259 | 219 | 391 | 430 | 495 | 33 | 59 | 31 | 41 | -0.78 | 390 | 409 | 429 | 428 | 450 | 498 | 20.1 |
| 38 | 1121 | III | PI 398672  | 14 | 670  | 262 | 217 | 377 | 419 | 464 | 31 | 56 | 31 | 42 | -0.73 | 380 | 400 | 425 | 429 | 443 | 472 | 20.3 |
| 39 | 1122 | III | PI 360843  | 18 | 1544 | 213 | 189 | 373 | 419 | 459 | 19 | 30 | 22 | 18 | -0.68 | 377 | 402 | 415 | 424 | 435 | 456 | 23.3 |
| 40 | 1138 | IV  | PI 253666A | 9  | 735  | 242 | 141 | 376 | 431 | 494 | 42 | 76 | 58 | 73 | -0.80 | 379 | 413 | 434 | 446 | 453 | 493 | 31.2 |
| 41 | 1139 | IV  | PI 407788A | 17 | 1399 | 283 | 167 | 391 | 434 | 476 | 32 | 69 | 54 | 71 | -0.83 | 391 | 412 | 420 | 447 | 455 | 484 | 26.3 |
| 42 | 1140 | IV  | PI 424286  | 16 | 554  | 264 | 189 | 389 | 429 | 467 | 27 | 63 | 39 | 60 | -0.83 | 389 | 411 | 431 | 441 | 448 | 465 | 23.3 |
| 43 | 1142 | IV  | PI 407877B | 10 | 936  | 278 | 217 | 397 | 429 | 473 | 21 | 52 | 33 | 54 | -0.80 | 397 | 412 | 423 | 425 | 447 | 482 | 20.3 |
| 44 | 1143 | IV  | PI 398704  | 5  | 415  | 279 | 195 | 378 | 431 | 471 | 32 | 69 | 54 | 71 | -0.83 | 380 | 411 | 422 | 446 | 455 | 475 | 22.6 |
| 45 | 1145 | IV  | PI 398970  | 1  | 85   | 165 | 115 | 381 | 428 | 478 | 38 | 74 | 48 | 67 | -0.81 | 384 | 413 | 416 | 438 | 442 | 473 | 38.3 |
| 46 | 1146 | IV  | PI 407823  | 5  | 2190 | 254 | 171 | 397 | 424 | 467 | 19 | 48 | 40 | 62 | -0.75 | 396 | 408 | 416 | 432 | 440 | 463 | 25.7 |
| 47 | 1152 | IV  | PI 407773B | 2  | 500  | 260 | 145 | 394 | 425 | 465 | 26 | 61 | 40 | 62 | -0.81 | 393 | 410 | 416 | 420 | 439 | 463 | 30.3 |
| 48 | 1183 | V   | PI 458256  | 9  | 870  | 288 | 231 | 377 | 411 | 451 | 15 | 34 | 15 | 0  | -0.68 | 376 | 396 | 417 | 405 | 425 | 448 | 19.0 |
