# Supplementary material for: Multi-Population Selective Genotyping to Identify Soybean [Glycine max (L.) Merr.] Seed Protein and Oil QTLs
Source: PubMed Central journal article supplement (PMC4889660; doi:10.1534/g3.116.027656), 2016-04-01
Supplement: supp_g3.116.027656_TableS3.pdf [file supp_g3.116.027656_TableS3.pdf]

**TABLE S3.** The number of SNP markers detected as segregating in each soybean chromosome in each of the 48 F<sub>2</sub> populations versus the 1536 potentially detectable SNPs on the USLP 1.0 chip (Hyten *et al.* 2010). Some selectively genotyped F<sub>2</sub> individuals and some SNP markers were removed from the populations during the R/qtI error-checking phase of the project. Thus, final F<sub>2</sub> phenotype (Phe) and genotype (Gen) numbers, final selective genotyping (SG) percentage, final total non-missing genotype percentage, and final F<sub>2</sub> AA:AB:BB segregation ratios (summed over SNPs) are presented here for each mating. Relative to the last three F<sub>2</sub> SNP segregation columns, the high protein parent was arbitrarily assigned the BB genotype code at each SNP locus.

| Mating |      | Final F <sub>2</sub> Data |     | Non | Soybean Chromosome: |      |                                                          |    |    |    |    |    |    |    |    |    |    |    |    |    |    |    |    |     | All | SNP Marker  |      |           |      |      |      |
|--------|------|---------------------------|-----|-----|---------------------|------|----------------------------------------------------------|----|----|----|----|----|----|----|----|----|----|----|----|----|----|----|----|-----|-----|-------------|------|-----------|------|------|------|
|        |      |                           |     |     | 1                   | 2    | 3                                                        | 4  | 5  | 6  | 7  | 8  | 9  | 10 | 11 | 12 | 13 | 14 | 15 | 16 | 17 | 18 | 19 | 20  | Chr | Segregation |      |           |      |      |      |
| No.    | ID   | MG                        | Phe | Gen | SG                  | Miss | Number of SNP markers on the Soybean USLP 1.0 Chip       |    |    |    |    |    |    |    |    |    |    |    |    |    |    |    |    |     |     |             | Pop  | Ratio (%) |      |      |      |
|        |      |                           | no. | %   | %                   |      | 63                                                       | 90 | 67 | 81 | 80 | 92 | 65 | 96 | 84 | 72 | 54 | 63 | 92 | 61 | 85 | 68 | 78 | 115 | 56  | 74          | 1536 | SNP       | AA   | AB   | BB   |
|        |      |                           |     |     |                     |      | Number of SNP markers detected as parentally polymorphic |    |    |    |    |    |    |    |    |    |    |    |    |    |    |    |    |     |     |             | %    | % -----   |      |      |      |
| 1      | 1001 | 000                       | 253 | 44  | 17.4                | 16.1 | 15                                                       | 34 | 24 | 26 | 23 | 20 | 18 | 33 | 32 | 22 | 13 | 24 | 25 | 21 | 16 | 29 | 20 | 20  | 20  | 17          | 452  | 29.4      | 23.5 | 50.9 | 25.5 |
| 2      | 1002 | 000                       | 266 | 41  | 15.4                | 13.8 | 13                                                       | 32 | 24 | 24 | 23 | 17 | 17 | 33 | 30 | 21 | 13 | 22 | 27 | 20 | 14 | 29 | 20 | 15  | 20  | 16          | 430  | 28.0      | 21.0 | 58.1 | 21.0 |
| 3      | 1003 | 000                       | 251 | 44  | 17.5                | 16.0 | 13                                                       | 29 | 16 | 21 | 21 | 20 | 16 | 23 | 28 | 18 | 13 | 21 | 20 | 13 | 13 | 23 | 19 | 18  | 17  | 12          | 374  | 24.3      | 23.7 | 51.7 | 24.6 |
| 4      | 1004 | 000                       | 247 | 40  | 16.2                | 14.5 | 13                                                       | 29 | 18 | 21 | 23 | 20 | 18 | 23 | 27 | 18 | 12 | 21 | 23 | 13 | 13 | 24 | 19 | 16  | 16  | 13          | 380  | 24.7      | 20.1 | 55.9 | 24.0 |
| 5      | 1005 | 000                       | 254 | 43  | 16.9                | 16.5 | 18                                                       | 35 | 26 | 28 | 26 | 22 | 19 | 37 | 33 | 23 | 16 | 22 | 28 | 24 | 17 | 29 | 23 | 21  | 24  | 17          | 488  | 31.8      | 24.6 | 48.2 | 27.2 |
| 6      | 1006 | 000                       | 260 | 44  | 16.9                | 16.0 | 18                                                       | 35 | 26 | 27 | 27 | 22 | 19 | 35 | 31 | 23 | 16 | 22 | 27 | 24 | 17 | 29 | 22 | 21  | 24  | 18          | 483  | 31.4      | 21.5 | 52.4 | 26.1 |
| 7      | 1007 | 000                       | 261 | 44  | 16.9                | 15.5 | 14                                                       | 23 | 13 | 13 | 19 | 13 | 8  | 27 | 24 | 14 | 10 | 15 | 19 | 16 | 12 | 22 | 14 | 17  | 11  | 13          | 317  | 20.6      | 25.1 | 50.8 | 24.1 |
| 8      | 1009 | 000                       | 266 | 42  | 15.8                | 14.3 | 14                                                       | 22 | 11 | 11 | 19 | 13 | 7  | 26 | 23 | 13 | 9  | 14 | 18 | 16 | 12 | 21 | 14 | 17  | 11  | 14          | 305  | 19.9      | 19.6 | 58.3 | 22.1 |
| 9      | 1022 | 00                        | 248 | 38  | 15.3                | 14.1 | 26                                                       | 34 | 27 | 33 | 28 | 21 | 12 | 34 | 21 | 18 | 17 | 19 | 30 | 18 | 30 | 30 | 23 | 26  | 20  | 16          | 483  | 31.4      | 22.6 | 51.9 | 25.5 |
| 10     | 1023 | 00                        | 239 | 41  | 17.2                | 16.2 | 26                                                       | 36 | 25 | 33 | 27 | 21 | 12 | 35 | 21 | 18 | 17 | 19 | 31 | 18 | 29 | 30 | 23 | 26  | 22  | 15          | 484  | 31.5      | 22.4 | 52.1 | 25.5 |
| 11     | 1024 | 00                        | 257 | 42  | 16.3                | 15.8 | 26                                                       | 36 | 27 | 33 | 28 | 21 | 12 | 32 | 21 | 18 | 17 | 19 | 31 | 18 | 29 | 30 | 23 | 24  | 22  | 16          | 483  | 31.4      | 23.6 | 52.9 | 23.5 |
| 12     | 1025 | 00                        | 258 | 44  | 17.1                | 16.9 | 26                                                       | 36 | 27 | 33 | 27 | 21 | 11 | 34 | 21 | 18 | 17 | 19 | 31 | 18 | 30 | 30 | 23 | 26  | 22  | 16          | 486  | 31.6      | 23.1 | 52.0 | 24.9 |
| 13     | 1026 | 00                        | 173 | 44  | 25.4                | 24.6 | 19                                                       | 33 | 27 | 20 | 21 | 22 | 16 | 28 | 22 | 9  | 21 | 18 | 36 | 18 | 30 | 20 | 20 | 19  | 17  | 15          | 431  | 28.1      | 24.1 | 52.0 | 23.9 |
| 14     | 1027 | 00                        | 249 | 43  | 17.3                | 17.0 | 28                                                       | 40 | 31 | 37 | 28 | 23 | 13 | 36 | 20 | 19 | 20 | 22 | 36 | 19 | 30 | 31 | 23 | 26  | 23  | 22          | 527  | 34.3      | 24.0 | 50.5 | 25.5 |
| 15     | 2211 | 00                        | 147 | 44  | 29.9                | 29.5 | 10                                                       | 42 | 19 | 26 | 30 | 26 | 10 | 16 | 20 | 19 | 20 | 20 | 22 | 9  | 29 | 17 | 16 | 46  | 9   | 19          | 425  | 27.7      | 25.1 | 47.6 | 27.3 |
| 16     | 2212 | 00                        | 278 | 44  | 15.8                | 14.8 | 17                                                       | 35 | 15 | 20 | 20 | 26 | 21 | 29 | 15 | 11 | 10 | 25 | 20 | 13 | 28 | 22 | 13 | 34  | 10  | 18          | 402  | 26.2      | 24.5 | 49.7 | 25.8 |
| 17     | 2213 | 00                        | 269 | 38  | 14.1                | 13.8 | 17                                                       | 41 | 20 | 24 | 27 | 24 | 18 | 20 | 16 | 13 | 12 | 22 | 29 | 15 | 27 | 22 | 13 | 23  | 10  | 19          | 412  | 26.8      | 27.2 | 49.0 | 23.8 |
| 18     | 1039 | 0                         | 257 | 44  | 17.1                | 16.5 | 29                                                       | 39 | 24 | 24 | 28 | 25 | 15 | 27 | 27 | 25 | 12 | 30 | 43 | 29 | 28 | 35 | 27 | 31  | 20  | 19          | 537  | 35.0      | 24.0 | 49.1 | 26.8 |
| 19     | 1040 | 0                         | 237 | 43  | 18.1                | 17.6 | 29                                                       | 39 | 24 | 23 | 28 | 25 | 19 | 26 | 29 | 24 | 13 | 30 | 43 | 27 | 28 | 35 | 27 | 33  | 20  | 19          | 541  | 35.2      | 26.3 | 49.2 | 24.6 |
| 20     | 1041 | 0                         | 246 | 42  | 17.1                | 16.2 | 24                                                       | 37 | 21 | 17 | 27 | 21 | 10 | 22 | 24 | 22 | 9  | 25 | 33 | 13 | 18 | 29 | 12 | 22  | 18  | 11          | 415  | 27.0      | 25.7 | 48.7 | 25.6 |
| 21     | 1042 | 0                         | 208 | 42  | 20.2                | 19.4 | 29                                                       | 38 | 28 | 20 | 23 | 24 | 14 | 27 | 27 | 23 | 15 | 28 | 41 | 29 | 31 | 32 | 20 | 30  | 20  | 16          | 515  | 33.5      | 22.9 | 50.4 | 26.6 |
| 22     | 1043 | 0                         | 248 | 44  | 17.7                | 16.8 | 19                                                       | 34 | 16 | 14 | 22 | 15 | 12 | 18 | 23 | 17 | 8  | 24 | 31 | 11 | 14 | 20 | 16 | 17  | 12  | 9           | 352  | 22.9      | 24.7 | 50.1 | 25.2 |
| 23     | 1044 | 0                         | 241 | 40  | 16.6                | 15.7 | 22                                                       | 29 | 27 | 28 | 17 | 20 | 16 | 18 | 27 | 16 | 18 | 20 | 35 | 23 | 31 | 35 | 15 | 35  | 15  | 17          | 464  | 30.2      | 24.0 | 50.5 | 25.5 |

|    |      |     |     |    |      |      |    |    |    |    |    |    |    |    |    |    |    |    |    |    |    |    |    |    |    |    |     |      |      |      |      |
|----|------|-----|-----|----|------|------|----|----|----|----|----|----|----|----|----|----|----|----|----|----|----|----|----|----|----|----|-----|------|------|------|------|
| 24 | 1054 | I   | 184 | 44 | 23.9 | 22.3 | 16 | 22 | 14 | 11 | 16 | 29 | 6  | 24 | 14 | 22 | 15 | 17 | 20 | 14 | 25 | 15 | 13 | 24 | 16 | 15 | 348 | 22.7 | 23.3 | 52.5 | 24.7 |
| 25 | 1055 | I   | 264 | 43 | 16.3 | 15.6 | 20 | 28 | 22 | 33 | 20 | 22 | 13 | 24 | 20 | 26 | 17 | 27 | 27 | 21 | 28 | 25 | 20 | 21 | 18 | 18 | 450 | 29.3 | 24.0 | 52.4 | 23.6 |
| 26 | 1056 | I   | 257 | 43 | 16.7 | 16.1 | 21 | 23 | 20 | 29 | 26 | 25 | 14 | 20 | 22 | 24 | 14 | 27 | 27 | 20 | 22 | 22 | 22 | 23 | 15 | 16 | 432 | 28.1 | 27.3 | 50.1 | 22.6 |
| 27 | 1057 | I   | 246 | 44 | 17.9 | 17.1 | 12 | 27 | 19 | 19 | 27 | 18 | 13 | 14 | 27 | 17 | 16 | 11 | 20 | 13 | 26 | 26 | 17 | 30 | 9  | 18 | 379 | 24.7 | 24.2 | 52.5 | 23.3 |
| 28 | 1058 | I   | 243 | 41 | 16.9 | 16.4 | 26 | 23 | 15 | 25 | 20 | 20 | 10 | 22 | 22 | 25 | 18 | 26 | 30 | 26 | 23 | 30 | 19 | 24 | 20 | 20 | 444 | 28.9 | 25.4 | 48.9 | 25.7 |
| 29 | 1075 | II  | 181 | 42 | 23.2 | 22.7 | 24 | 23 | 15 | 21 | 28 | 25 | 14 | 19 | 20 | 18 | 14 | 23 | 19 | 18 | 28 | 28 | 12 | 32 | 21 | 17 | 419 | 27.3 | 25.3 | 49.6 | 25.1 |
| 30 | 1076 | II  | 187 | 43 | 23.0 | 22.6 | 24 | 21 | 25 | 23 | 27 | 43 | 37 | 18 | 34 | 27 | 18 | 24 | 28 | 18 | 33 | 29 | 21 | 34 | 28 | 20 | 532 | 34.6 | 24.1 | 50.9 | 25.0 |
| 31 | 1098 | II  | 229 | 43 | 18.8 | 18.0 | 11 | 19 | 26 | 7  | 18 | 6  | 3  | 5  | 10 | 17 | 7  | 8  | 12 | 13 | 16 | 12 | 16 | 26 | 8  | 19 | 259 | 16.9 | 30.4 | 46.0 | 23.6 |
| 32 | 1107 | III | 221 | 43 | 19.5 | 19.1 | 20 | 31 | 26 | 26 | 38 | 18 | 19 | 30 | 21 | 21 | 17 | 26 | 32 | 24 | 26 | 23 | 20 | 45 | 16 | 30 | 509 | 33.1 | 29.6 | 48.3 | 22.1 |
| 33 | 1108 | III | 226 | 44 | 19.5 | 19.1 | 25 | 19 | 22 | 24 | 24 | 27 | 16 | 23 | 20 | 17 | 24 | 28 | 35 | 19 | 35 | 28 | 18 | 42 | 20 | 12 | 478 | 31.1 | 25.7 | 51.2 | 23.1 |
| 34 | 1109 | III | 225 | 44 | 19.6 | 19.0 | 19 | 37 | 18 | 32 | 29 | 26 | 11 | 28 | 19 | 20 | 17 | 25 | 37 | 19 | 27 | 24 | 23 | 40 | 20 | 24 | 495 | 32.2 | 23.8 | 50.2 | 25.9 |
| 35 | 1110 | III | 208 | 44 | 21.2 | 21.0 | 18 | 40 | 21 | 27 | 38 | 17 | 22 | 36 | 17 | 25 | 20 | 27 | 36 | 22 | 30 | 27 | 21 | 41 | 18 | 30 | 533 | 34.7 | 25.8 | 49.5 | 24.7 |
| 36 | 1111 | III | 214 | 42 | 19.6 | 18.3 | 25 | 40 | 20 | 21 | 34 | 22 | 18 | 23 | 18 | 16 | 20 | 24 | 26 | 13 | 23 | 28 | 25 | 29 | 22 | 24 | 471 | 30.7 | 24.4 | 50.2 | 25.4 |
| 37 | 1113 | III | 219 | 44 | 20.1 | 19.9 | 18 | 37 | 19 | 28 | 28 | 13 | 18 | 34 | 16 | 17 | 18 | 24 | 37 | 28 | 26 | 30 | 20 | 45 | 19 | 28 | 503 | 32.7 | 24.9 | 51.0 | 24.1 |
| 38 | 1121 | III | 217 | 44 | 20.3 | 19.5 | 18 | 26 | 18 | 22 | 32 | 19 | 12 | 28 | 12 | 26 | 21 | 24 | 21 | 21 | 25 | 34 | 20 | 44 | 20 | 27 | 470 | 30.6 | 25.2 | 49.5 | 25.3 |
| 39 | 1122 | III | 189 | 44 | 23.3 | 22.5 | 25 | 25 | 15 | 16 | 20 | 14 | 15 | 24 | 19 | 22 | 14 | 14 | 21 | 13 | 24 | 29 | 17 | 26 | 20 | 24 | 397 | 25.8 | 23.3 | 48.7 | 28.0 |
| 40 | 1138 | IV  | 141 | 44 | 31.2 | 30.7 | 28 | 34 | 19 | 20 | 34 | 31 | 23 | 38 | 38 | 21 | 24 | 28 | 24 | 13 | 40 | 19 | 31 | 40 | 18 | 37 | 560 | 36.5 | 26.0 | 49.9 | 24.1 |
| 41 | 1139 | IV  | 166 | 43 | 25.9 | 24.7 | 17 | 41 | 24 | 23 | 30 | 22 | 22 | 25 | 24 | 19 | 12 | 20 | 34 | 16 | 21 | 19 | 26 | 47 | 19 | 25 | 486 | 31.6 | 24.3 | 47.1 | 28.6 |
| 42 | 1140 | IV  | 188 | 43 | 22.9 | 22.8 | 14 | 33 | 24 | 20 | 26 | 30 | 16 | 33 | 27 | 24 | 18 | 30 | 24 | 8  | 22 | 23 | 25 | 39 | 23 | 25 | 484 | 31.5 | 25.5 | 47.3 | 27.1 |
| 43 | 1142 | IV  | 217 | 44 | 20.3 | 20.0 | 16 | 42 | 23 | 19 | 23 | 30 | 20 | 24 | 16 | 19 | 12 | 26 | 40 | 14 | 29 | 27 | 25 | 46 | 18 | 30 | 499 | 32.5 | 25.9 | 49.8 | 24.3 |
| 44 | 1143 | IV  | 194 | 43 | 22.2 | 21.3 | 12 | 38 | 22 | 18 | 24 | 28 | 22 | 30 | 20 | 17 | 21 | 23 | 28 | 12 | 25 | 24 | 25 | 46 | 28 | 36 | 499 | 32.5 | 25.3 | 48.2 | 26.5 |
| 45 | 1145 | IV  | 115 | 44 | 38.3 | 35.8 | 10 | 43 | 20 | 19 | 28 | 22 | 22 | 26 | 21 | 15 | 18 | 25 | 32 | 9  | 19 | 20 | 19 | 33 | 19 | 27 | 447 | 29.1 | 24.0 | 53.8 | 22.3 |
| 46 | 1146 | IV  | 165 | 38 | 23.0 | 22.1 | 17 | 28 | 17 | 22 | 22 | 24 | 23 | 20 | 13 | 14 | 13 | 20 | 24 | 14 | 21 | 20 | 13 | 36 | 21 | 14 | 396 | 25.8 | 26.5 | 49.8 | 23.7 |
| 47 | 1152 | IV  | 144 | 43 | 29.9 | 29.7 | 15 | 44 | 15 | 19 | 15 | 30 | 23 | 17 | 14 | 22 | 17 | 23 | 17 | 12 | 23 | 24 | 19 | 39 | 24 | 16 | 428 | 27.9 | 24.1 | 49.4 | 26.5 |
| 48 | 1183 | V   | 230 | 43 | 18.7 | 18.6 | 14 | 44 | 26 | 17 | 26 | 27 | 13 | 25 | 19 | 24 | 21 | 31 | 33 | 10 | 24 | 30 | 30 | 39 | 25 | 34 | 512 | 33.3 | 24.1 | 49.2 | 26.7 |

---
